# Supplementary material for: Reference Genes across Nine Brain Areas of Wild Type and Prader-Willi Syndrome Mice: Assessing Differences in Igfbp7, Pcsk1, Nhlh2 and Nlgn3 Expression
Source: MDPI journal article supplement (doi:10.3390/ijms23158729), 2022-08-05
Supplement: s1 [file s1]

| RT-qPCR analysis   |                                                        |                                                      |         |                |           |
|--------------------|--------------------------------------------------------|------------------------------------------------------|---------|----------------|-----------|
| Gene symbol - name | Primer sequences                                       | Amplicon                                             | Probe # | Probe sequence |           |
| ActB               | Beta-actin                                             | F ctaaggccaacccgtgaaaag<br>R accagaggcatcacagggaca   | 104 nt  | #64            | ccaggctg  |
| Alg5               | Dolichyl-phosphate beta-glucosyltransferase            | F cacagtgcgggtcaaattac<br>R acagcagctctacatcaaatgc   | 96 nt   | #66            | ggctgctg  |
| B2M                | Beta-2-Microglobulin                                   | Thermofisher, Assay ID Mm00437762_m1                 |         |                |           |
| Cyc1               | Cytochrome c1                                          | F tgctacacggaggaagaagc<br>R ccatcatcattaggccatc      | 71 nt   | #10            | ccacctcc  |
| Gusβ               | Beta-glucuronidase                                     | F gaggatcaacagtgccatt<br>R agcctcaaaggggagggtg       | 91nt    | #31            | ttcacca   |
| Hmbs               | Mydroxymethylbilane synthase                           | F agaaaagtgccgtgggaac<br>R tgttgagggttccccgaat       | 99 nt   | #91            | ctctctc   |
| Man2b2             | Mannosidase Alpha Class 2B Member 2                    | F tgactacgacctcaaggatgc<br>R acccatgccacacgaact      | 62 nt   | #4             | cttctctgc |
| Mogs               | Mannosyl-Oligosaccharide Glucosidase                   | F gctcaccactgagttcgtca<br>R accaaaggaaggaaggtgt      | 108 nt  | #78            | ctccagct  |
| Sdha               | Succinate Dehydrogenase Complex Flavoprotein Subunit A | F ccctgagcattgcagaatc<br>R tctctccagcatttgcctta      | 70 nt   | #80            | ggcggcgg  |
| Snhg12             | Small Nucleolar RNA Host Gene 12                       | F ggaagggaccggatttttc<br>R cctcacaatcttcaacagg       | 112 nt  | #93            | ggaccaga  |
| Tfrc               | Transferrin receptor                                   | F gctttgggtgctgtgtt<br>R tgctgggtctaaatccatcttt      | 109 nt  | #47            | tccagtgt  |
| Igfbp7             | insulin-like growth factor binding protein 7           | F tgccctccatgaaataccac<br>R ggctgtctgagagcaccttt     | 96 nt   | #110           | AGCCTCTG  |
| Pcsk1              | proprotein convertase subtilisin/kexin type 1          | F tggagttgcataaattcaaagtt<br>R agcctcaatggcatcagttac | 73 nt   | #42            | GCTGGATG  |
| Pcsk2              | proprotein convertase subtilisin/kexin type 2          | F aggaagaggctcgccaag<br>R agtgatacaggcctctgcaa       | 78 nt   | #84            | TCTGCTGC  |
| Nhlh2              | nescient helix loop helix 2                            | F aatattggctgcttttaattttgc<br>R ggactcagcatcattttgag | 125 nt  | #63            | CTCCTCCT  |
| Nlgn3_total        | Neuroigin 3                                            | F CCACGGAGGCTCTTACATGG<br>R GCCTGATCTCCAGTGCTCAG     | 135 nt  | #121           | GATGGCAG  |
| Nlgn3_Iso1         | Neuroigin 3 (isoform 1, incl. Exon3)                   | F GCCCAACAAGAAAATTGTAGC<br>R TGACGTTGCCGTAACCTGC     | 203 nt  | #147           | GCCATCAA  |
| Nlgn3_Iso2         | Neuroigin 3 (isoform 2, excl. Exon3)                   | F TGCCCACGGAAGATGGATC<br>R ACGATGACGTTGCCGTAAC       | 193 nt  | #147           | GCCATCAA  |

## DNA oligonucleotides for northern blot hybridization

Snord115R - CAGCGTAATCCTATTGAGCATGAAT  
 Snord116R - GTCCGATGAGAGTGCGGTACAGAGT

**Table S1.** List of oligonucleotides primers and probes used in RT-PCR analyses and Northern blot hybridization.
