# Supplementary material for: Reference Genes across Nine Brain Areas of Wild Type and Prader-Willi Syndrome Mice: Assessing Differences in Igfbp7, Pcsk1, Nhlh2 and Nlgn3 Expression
Source: MDPI journal article supplement (doi:10.3390/ijms23158729), 2022-08-05
Supplement: s1 [file s1]

**A**Expression stability in olfactory bulb between WT and  $PWScr^{m+/p-}$ 

| Method       | 1             | 2      | 3    | 4    | 5    | 6      | 7      | 8      |
|--------------|---------------|--------|------|------|------|--------|--------|--------|
| Delta CT     | Alg5          | Snhg12 | Tfrc | Cyc1 | Hmbs | Man2b2 | Mogs   | Gusβ   |
| BestKeeper   | Snhg12        | Alg5   | Tfrc | Hmbs | Mogs | Gusβ   | Cyc1   | Man2b2 |
| Normfinder   | Alg5          | Snhg12 | Tfrc | Cyc1 | Hmbs | Mogs   | Man2b2 | Gusβ   |
| Genorm       | Snhg12   Alg5 |        | Tfrc | Hmbs | Cyc1 | Man2b2 | Mogs   | Gusβ   |
| avg. ranking | Alg5          | Snhg12 | Tfrc | Hmbs | Cyc1 | Mogs   | Man2b2 | Gusβ   |

**B**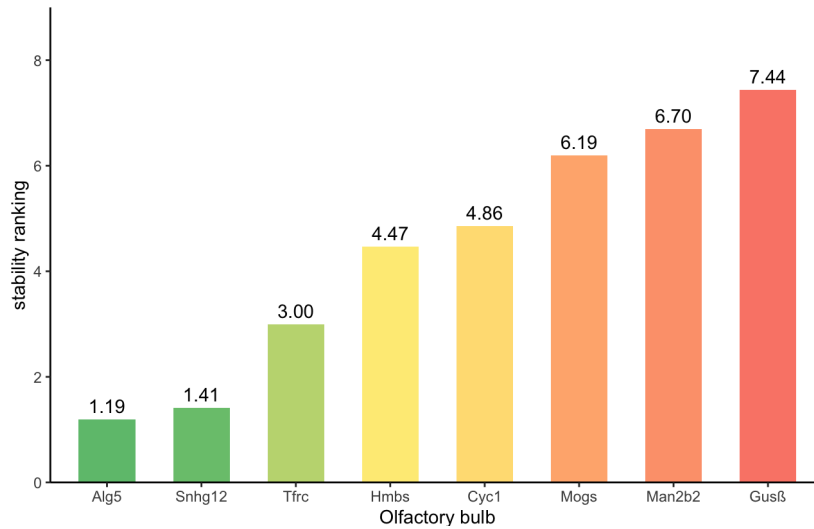

**Figure S1. Reference gene ranking in olfactory bulb.** (A) Expression stability ranking of reference gene candidates in olfactory bulb between WT and  $PWScr^{m+/p-}$  mice; determined by four different stability ranking methods. Avg. ranking: shows the calculation of the resulting average ranking of the candidate genes (highlighted in gray; bottom row). (B) Average ranking position of each of the genes (lower average rank/green is more stable than higher average rank/red) in olfactory bulb between WT and  $PWScr^{m+/p-}$  mice.

**A**Expression stability in isocortex between WT and  $PWScr^{m+/p-}$ 

| Method       | 1             | 2      | 3      | 4    | 5    | 6    | 7    | 8      |
|--------------|---------------|--------|--------|------|------|------|------|--------|
| Delta CT     | Alg5          | Man2b2 | Tfrc   | Hmbs | Mogs | Gusβ | Cyc1 | Snhg12 |
| BestKeeper   | Hmbs          | Alg5   | Man2b2 | Tfrc | Gusβ | Mogs | Cyc1 | Snhg12 |
| Normfinder   | Alg5          | Man2b2 | Tfrc   | Hmbs | Mogs | Gusβ | Cyc1 | Snhg12 |
| Genorm       | Man2b2   Alg5 |        | Hmbs   | Tfrc | Mogs | Cyc1 | Gusβ | Snhg12 |
| avg. ranking | Alg5          | Man2b2 | Hmbs   | Tfrc | Mogs | Gusβ | Cyc1 | Snhg12 |

**B**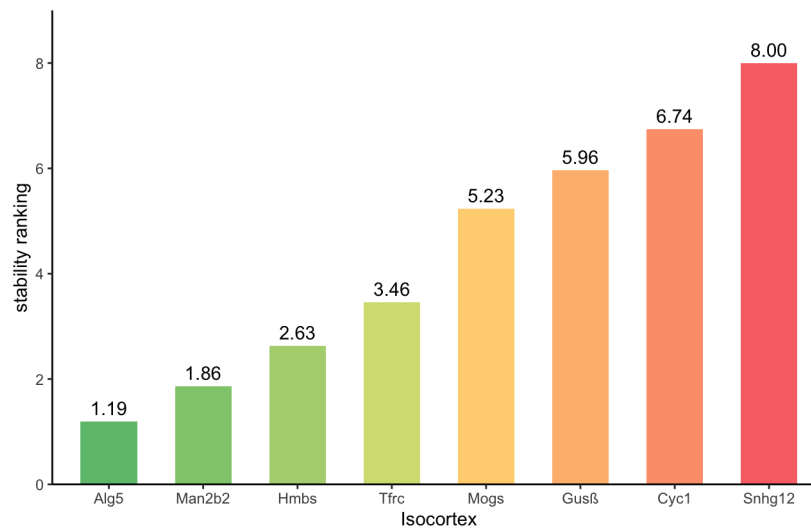

**Figure S2. Reference gene ranking in isocortex.** (A) Expression stability ranking of reference gene candidates in isocortex between WT and  $PWScr^{m+/p-}$  mice; determined by four different stability ranking methods. Avg. ranking: shows the calculation of the resulting average ranking of the candidate genes (highlighted in gray; bottom row). (B) Average ranking position of each of the genes (lower average rank/green is more stable than higher average rank/red) in isocortex between WT and  $PWScr^{m+/p-}$  mice.

**A**Expression stability in hippocampus between WT and  $PWScr^{m+/p-}$ 

| Method       | 1           | 2      | 3    | 4    | 5      | 6      | 7      | 8    |
|--------------|-------------|--------|------|------|--------|--------|--------|------|
| Delta CT     | Hmbs        | Alg5   | Gusβ | Mogs | Cyc1   | Snhg12 | Man2b2 | Tfrc |
| BestKeeper   | Alg5        | Snhg12 | Hmbs | Gusβ | Mogs   | Man2b2 | Tfrc   | Cyc1 |
| Normfinder   | Hmbs        | Alg5   | Gusβ | Mogs | Cyc1   | Snhg12 | Man2b2 | Tfrc |
| Genorm       | Mogs   Hmbs |        | Gusβ | Alg5 | Cyc1   | Snhg12 | Man2b2 | Tfrc |
| avg. ranking | Hmbs        | Alg5   | Mogs | Gusβ | Snhg12 | Cyc1   | Man2b2 | Tfrc |

**B**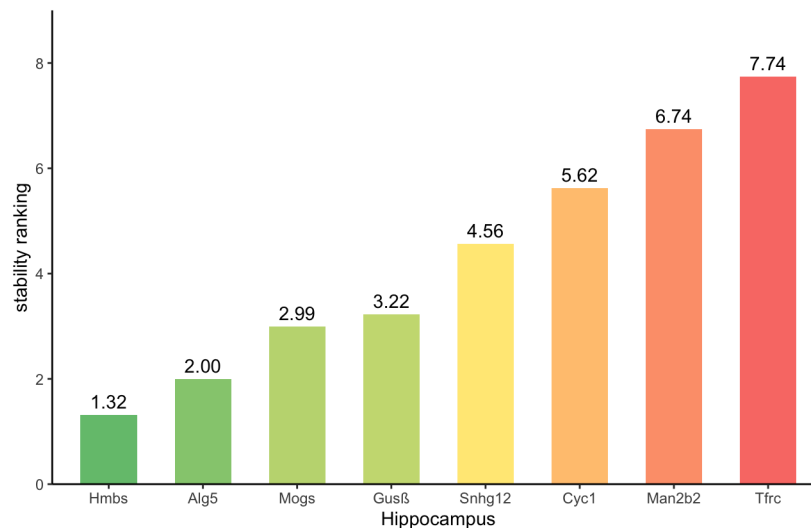

**Figure S3. Reference gene ranking in hippocampus.** (A) Expression stability ranking of reference gene candidates in hippocampus between WT and  $PWScr^{m+/p-}$  mice; determined by four different stability ranking methods. Avg. ranking: shows the calculation of the resulting average ranking of the candidate genes (highlighted in gray; bottom row). (B) Average ranking position of each of the genes (lower average rank/green is more stable than higher average rank/red) in hippocampus between WT and  $PWScr^{m+/p-}$  mice.

**A**Expression stability in thalamus between WT and *PWScr<sup>m+/p-</sup>*

| Method       | 1             | 2    | 3    | 4    | 5      | 6      | 7      | 8    |
|--------------|---------------|------|------|------|--------|--------|--------|------|
| Delta CT     | Tfrc          | Alg5 | Gusβ | Cyc1 | Snhg12 | Hmbs   | Man2b2 | Mogs |
| BestKeeper   | Alg5          | Gusβ | Tfrc | Hmbs | Snhg12 | Mogs   | Man2b2 | Cyc1 |
| Normfinder   | Tfrc          | Alg5 | Gusβ | Cyc1 | Hmbs   | Snhg12 | Man2b2 | Mogs |
| Genorm       | Snhg12   Cyc1 |      | Gusβ | Alg5 | Tfrc   | Hmbs   | Man2b2 | Mogs |
| avg. ranking | Tfrc          | Alg5 | Gusβ | Cyc1 | Snhg12 | Hmbs   | Man2b2 | Mogs |

**B**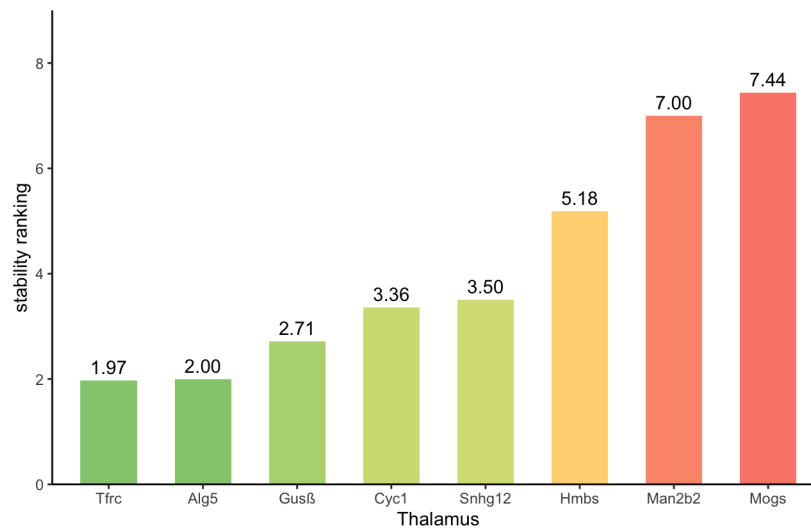

**Figure S4. Reference gene ranking in thalamus.** (A) Expression stability ranking of reference gene candidates in thalamus between WT and *PWScr<sup>m+/p-</sup>* mice; determined by four different stability ranking methods. Avg. ranking: shows the calculation of the resulting average ranking of the candidate genes (highlighted in gray; bottom row). (B) Average ranking position of each of the genes (lower average rank/green is more stable than higher average rank/red) in thalamus between WT and *PWScr<sup>m+/p-</sup>* mice.

**A**Expression stability in hypothalamus between WT and  $PWScr^{m+/p-}$ 

| Method       | 1           | 2      | 3      | 4      | 5      | 6      | 7    | 8    |
|--------------|-------------|--------|--------|--------|--------|--------|------|------|
| Delta CT     | Alg5        | Hmbs   | Man2b2 | Gusβ   | Mogs   | Snhg12 | Tfrc | Cyc1 |
| BestKeeper   | Snhg12      | Hmbs   | Alg5   | Mogs   | Gusβ   | Man2b2 | Tfrc | Cyc1 |
| Normfinder   | Alg5        | Man2b2 | Hmbs   | Gusβ   | Mogs   | Snhg12 | Tfrc | Cyc1 |
| Genorm       | Gusβ   Alg5 |        | Mogs   | Hmbs   | Man2b2 | Snhg12 | Tfrc | Cyc1 |
| avg. ranking | Alg5        | Hmbs   | Gusβ   | Man2b2 | Snhg12 | Mogs   | Tfrc | Cyc1 |

**B**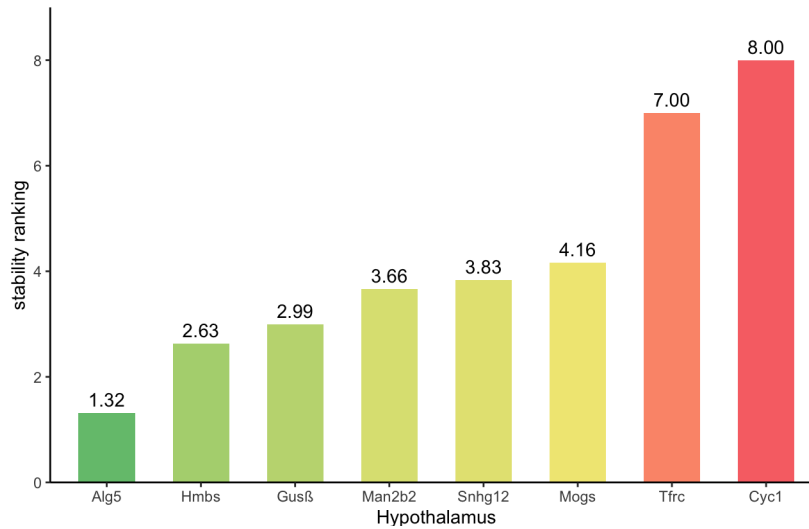

**Figure S5. Reference gene ranking in hypothalamus.** (A) Expression stability ranking of reference gene candidates in hypothalamus between WT and  $PWScr^{m+/p-}$  mice; determined by four different stability ranking methods. Avg. ranking: shows the calculation of the resulting average ranking of the candidate genes (highlighted in gray; bottom row). (B) Average ranking position of each of the genes (lower average rank/green is more stable than higher average rank/red) in hypothalamus between WT and  $PWScr^{m+/p-}$  mice.

**A**Expression stability in midbrain between WT and  $PWScr^{m+/p-}$ 

| Method       | 1           | 2    | 3    | 4      | 5    | 6      | 7      | 8      |
|--------------|-------------|------|------|--------|------|--------|--------|--------|
| Delta CT     | Hmbs        | Mogs | Cyc1 | Snhg12 | Alg5 | Gusβ   | Tfrc   | Man2b2 |
| BestKeeper   | Hmbs        | Cyc1 | Mogs | Gusβ   | Alg5 | Snhg12 | Man2b2 | Tfrc   |
| Normfinder   | Hmbs        | Cyc1 | Mogs | Snhg12 | Alg5 | Gusβ   | Tfrc   | Man2b2 |
| Genorm       | Mogs   Hmbs |      | Cyc1 | Snhg12 | Alg5 | Gusβ   | Tfrc   | Man2b2 |
| avg. ranking | Hmbs        | Mogs | Cyc1 | Snhg12 | Alg5 | Gusβ   | Tfrc   | Man2b2 |

**B**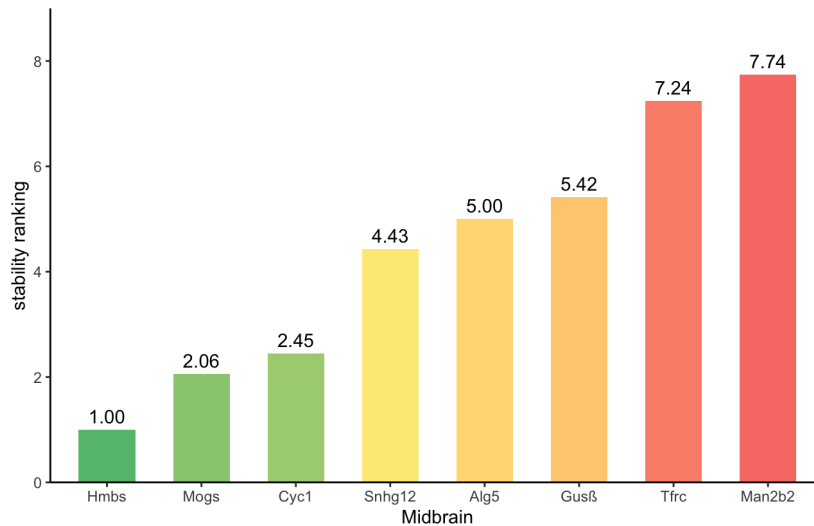

**Figure S6. Reference gene ranking in midbrain.** (A) Expression stability ranking of reference gene candidates in midbrain between WT and  $PWScr^{m+/p-}$  mice; determined by four different stability ranking methods. Avg. ranking: shows the calculation of the resulting average ranking of the candidate genes (highlighted in gray; bottom row). (B) Average ranking position of each of the genes (lower average rank/green is more stable than higher average rank/red) in midbrain between WT and  $PWScr^{m+/p-}$  mice.

**A**Expression stability in cerebellum between WT and  $PWScr^{m+/p-}$ 

| Method       | 1           | 2      | 3      | 4      | 5    | 6    | 7      | 8      |
|--------------|-------------|--------|--------|--------|------|------|--------|--------|
| Delta CT     | Hmbs        | Alg5   | Man2b2 | Cyc1   | Gusβ | Tfrc | Mogs   | Snhg12 |
| BestKeeper   | Tfrc        | Snhg12 | Hmbs   | Man2b2 | Alg5 | Mogs | Gusβ   | Cyc1   |
| Normfinder   | Hmbs        | Alg5   | Man2b2 | Cyc1   | Gusβ | Tfrc | Mogs   | Snhg12 |
| Genorm       | Hmbs   Alg5 |        | Cyc1   | Man2b2 | Gusβ | Tfrc | Mogs   | Snhg12 |
| avg. ranking | Hmbs        | Alg5   | Man2b2 | Tfrc   | Cyc1 | Gusβ | Snhg12 | Mogs   |

**B**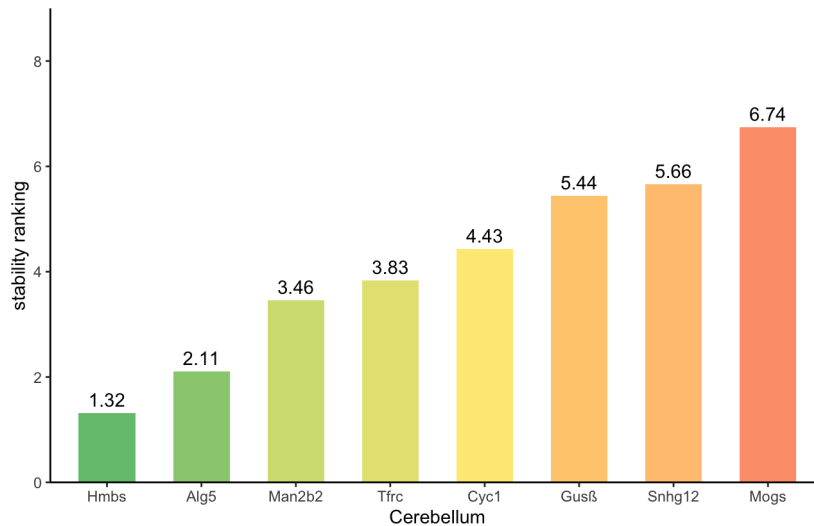

**Figure S7. Reference gene ranking in cerebellum.** (A) Expression stability ranking of reference gene candidates in cerebellum between WT and  $PWScr^{m+/p-}$  mice; determined by four different stability ranking methods. Avg. ranking: shows the calculation of the resulting average ranking of the candidate genes (highlighted in gray; bottom row). (B) Average ranking position of each of the genes (lower average rank/green is more stable than higher average rank/red) in cerebellum between WT and  $PWScr^{m+/p-}$  mice.

**A**Expression stability in pons between WT and *PWScr<sup>m+/p-</sup>*

| Method       | 1             | 2      | 3      | 4      | 5      | 6    | 7      | 8    |
|--------------|---------------|--------|--------|--------|--------|------|--------|------|
| Delta CT     | Mogs          | Cyc1   | Hmbs   | Snhg12 | Alg5   | Gusβ | Man2b2 | Tfrc |
| BestKeeper   | Alg5          | Man2b2 | Cyc1   | Snhg12 | Tfrc   | Hmbs | Gusβ   | Mogs |
| Normfinder   | Mogs          | Hmbs   | Cyc1   | Alg5   | Snhg12 | Gusβ | Man2b2 | Tfrc |
| Genorm       | Snhg12   Gusβ |        | Mogs   | Cyc1   | Alg5   | Hmbs | Man2b2 | Tfrc |
| avg. ranking | Mogs          | Cyc1   | Snhg12 | Alg5   | Hmbs   | Gusβ | Man2b2 | Tfrc |

**B**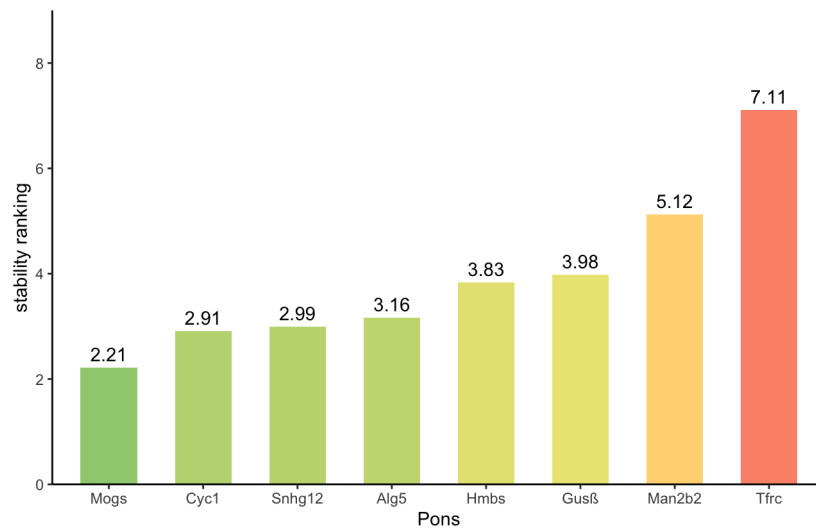

**Figure S8. Reference gene ranking in pons.** (A) Expression stability ranking of reference gene candidates in pons between WT and *PWScr<sup>m+/p-</sup>* mice; determined by four different stability ranking methods. Avg. ranking: shows the calculation of the resulting average ranking of the candidate genes (highlighted in gray; bottom row). (B) Average ranking position of each of the genes (lower average rank/green is more stable than higher average rank/red) in pons between WT and *PWScr<sup>m+/p-</sup>* mice.



**A**Expression stability in medulla between WT and  $PWScr^{m+/p-}$ 

| Method       | 1             | 2    | 3      | 4      | 5      | 6      | 7      | 8    |
|--------------|---------------|------|--------|--------|--------|--------|--------|------|
| Delta CT     | Hmbs          | Alg5 | Man2b2 | Gusβ   | Cyc1   | Snhg12 | Tfrc   | Mogs |
| BestKeeper   | Hmbs          | Alg5 | Man2b2 | Mogs   | Snhg12 | Tfrc   | Gusβ   | Cyc1 |
| Normfinder   | Hmbs          | Alg5 | Man2b2 | Gusβ   | Cyc1   | Tfrc   | Snhg12 | Mogs |
| Genorm       | Snhg12   Alg5 |      | Gusβ   | Hmbs   | Cyc1   | Tfrc   | Man2b2 | Mogs |
| avg. ranking | Hmbs          | Alg5 | Man2b2 | Snhg12 | Gusβ   | Cyc1   | Tfrc   | Mogs |

**B**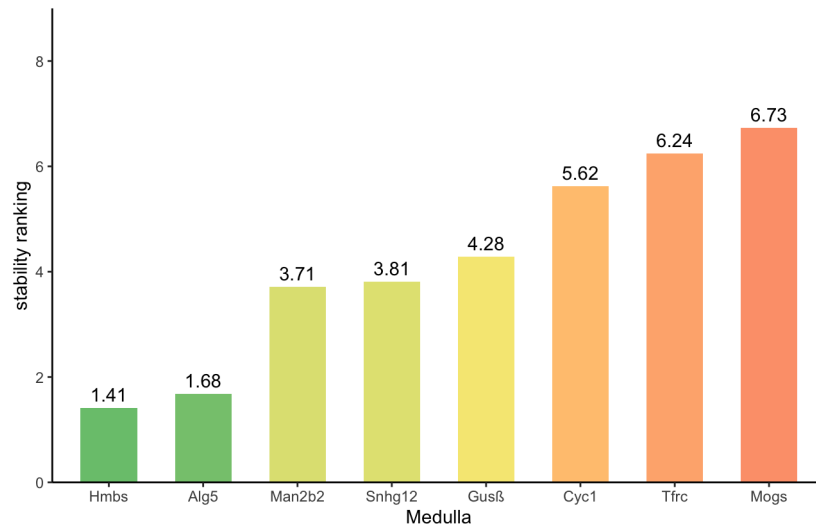

**Figure S9. Reference gene ranking in medulla.** (A) Expression stability ranking of reference gene candidates in medulla between WT and  $PWScr^{m+/p-}$  mice; determined by four different stability ranking methods. Avg. ranking: shows the calculation of the resulting average ranking of the candidate genes (highlighted in gray; bottom row). (B) Average ranking position of each of the genes (lower average rank/green is more stable than higher average rank/red) in medulla between WT and  $PWScr^{m+/p-}$  mice.
